# Supplementary material for: Intra-strain Elicitation and Suppression of Plant Immunity by Ralstonia solanacearum Type-III Effectors in Nicotiana benthamiana
Source: PubMed Central journal article supplement — Plant Commun. 2020 Jan 21;1(4):100025. doi: 10.1016/j.xplc.2020.100025 (PMC7747989; doi:10.1016/j.xplc.2020.100025), 2020-01-21
Supplement: mmc1.pdf [file mmc1.pdf]

**Plant Communications, Volume 1**

**Supplemental Information**

**Intra-strain Elicitation and Suppression of Plant Immunity by *Ralstonia solanacearum* Type-III Effectors in *Nicotiana benthamiana***

**Yuying Sang, Wenjia Yu, Haiyan Zhuang, Yali Wei, Lida Derevnina, Gang Yu, Jiamin Luo, and Alberto P. Macho**

## **Supplemental information**

### **Intra-strain elicitation and suppression of plant immunity by *Ralstonia solanacearum* type-III effectors in *Nicotiana benthamiana***

Yuying Sang<sup>1,#</sup>, Wenjia Yu<sup>1,2,#</sup>, Haiyan Zhuang<sup>1</sup>, Yali Wei<sup>1,2</sup>, Lida Derevnina<sup>3</sup>, Gang Yu<sup>1</sup>, Jiamin Luo<sup>1,2</sup> and Alberto P. Macho<sup>1\*</sup>.

#### **Includes:**

**Supplemental table (Table S1)**

**Supplemental figures (S1-S9)**

**Table S1:** Primers used in this study for RipE1 cloning and qRT-PCR.

| <b>Gene</b>                                                                  | <b>Forward primers</b>           | <b>Reverse primers</b>            |
|------------------------------------------------------------------------------|----------------------------------|-----------------------------------|
| <b>Primers for site-directed amino acid mutation</b>                         |                                  |                                   |
| <i>RipE1-C172A</i>                                                           | AGGGGCGGGGAACGCCGGCGA<br>ACACGCC | GGCGTGTCGCCGGCGTTCCC<br>CGCCCCT   |
| <i>RipE1 ΔAD</i>                                                             | GATACTGACGCACATCGACGCC<br>ACCCA  | TGGGTGGCGTCGATGTGCGTCA<br>GTATC   |
| <b>Primers for qRT-PCR in <i>N. benthamiana</i></b>                          |                                  |                                   |
| <i>NbEF1a</i>                                                                | CCCAAGAGGCCCTCAGACA              | CACACGACCAACAGGGACAGT             |
| <i>NbPR-1</i>                                                                | GGTCAACACGGCGAAAACC              | GCCTTAGCAGCCGTCATGA               |
| <i>NbICS1</i>                                                                | GTGTGCGCTCTGCTGTCTTCT            | CTGCGTATAGCACGCCAATC              |
| <i>NbPAL05</i>                                                               | AAGGGAGCTGAAATCGCCAT             | TCCGCACTTTGGACATGGTT              |
| <i>NbPAL08</i>                                                               | TATCACCCCATGCTTGCCCTC            | AGTGGCCTTGGAATTGGGTC              |
| <i>NbPAL10</i>                                                               | GTCACTCCATGTTTGCCCCT             | GACCTGTGAGTAAACCGGCA              |
| <i>NbLOX2</i>                                                                | TCTTGGGTGGCTCCTCTGACT            | TGTTGGAGGTCTGCCTGTTCT             |
| <i>NbAOS</i>                                                                 | CTGGGGTCAAACCTCCACACT            | TTGTGATGCAACTGGTGGTT              |
| <b>Primers for qRT-PCR in <i>A. thaliana</i></b>                             |                                  |                                   |
| <i>AtACTIN2</i>                                                              | TGCTGGACGTGACCTTACTG             | TTCTCGATGGAAGAGCTGGT              |
| <i>AtPR1</i>                                                                 | TGATCCTCGTGGGAATTATGT            | TGCATGATCACATCATTACTTCAT          |
| <i>AtICS1</i>                                                                | GCGTCGTTCCGGTTACAGG              | ACAGCGAGGCTGAATCTCAT              |
| <i>AtPAL1</i>                                                                | TATCCCGAACAGGATCAAGG             | TCTCCGGTCAAAGCTCTGT               |
| <i>AtPDF1.2</i>                                                              | ACTATGTCTTCCCAGCACAC             | AACAACAACGGGAAAATAAA              |
| <i>AtVSP2</i>                                                                | GTTTGGATCTTTGACCTAGACGA          | CTCTAACCACGACCAGTACGC             |
| <b>Primers for cloning RipE1 to sXVE:GFPc:Bar estradiol inducible vector</b> |                                  |                                   |
| <i>RipE1</i>                                                                 | TCAGGATCCATGCCGCCCGTCC<br>TGCCGT | ACTCTCGAGGCTTTCCGTGGCG<br>GGCGGCT |

Figure S1

```

Xs_XopE1 1 MRRSEAEERSPPNLLQSLQEIKMGLCSSKPSVAGSPVAGSPEHYLTHTEQTTPSTP-SS
Rs_RipE1 1 -----MPPVLPSTILRCF-----RPAVSR-PEAETAAPS--SSQENRPGSPERS
Ps_HopX1 1 MRIHSAGHSLPAPGPSVETTE-----K-AVQS-SSAQNPAACS-SQTERPEAGSTQVR

Xs_XopE1 60 PEAPMSPSLHGLVALGSSGTRRDRFR----OPTLQPHEVQQAAYQLGMRLSGRPIEDAS
Rs_RipE1 42 PRRR-PAALQGLTPRAGSSRRQAAPEAPAGPARFLIDGERQFGGYLMARDVDQRPVHGEP
Ps_HopX1 51 ENYF-YSS-----VKTRLEFP--VSSTGQAISDTPSSLPFGYLLLRRLDRPLDEDS

Xs_XopE1 115 DRQRLADATETVHETRLALHRGRGNVSDLRLSNGRSATYSSLSYCLGE-----
Rs_RipE1 101 -IDTLRSANETLLQTRRILTHGRGNVEDDIDATHGLSTHIAQGGRSIQESMWRRAH----
Ps_HopX1 98 -TKALVPADEAVREARRALPFRGNIDVDAQRTHLQSCARAVAAKRLRKDABRAGHEPMP

Xs_XopE1 164 -N---DENLLAGSALAAGAGNCDHNAAINARRHAVRMEDEGGQ----MMNVRDYEQTHL
Rs_RipE1 155 -PKPVVWA---AIAMVAGAGNCGEHADLAIFLHAAKKEGEA---VDNVHIDDFDHF
Ps_HopX1 157 GNDEMNVHVLVAMSEQVFGAGNCGEHARIASFAYGALAQESGRSPREKIHLAEQPGKDHV

Xs_XopE1 214 YALYQPPSSAAEAESPVVLDSWGDPVAVLLRDSHWAETYGTSTNVIERFDKRDATDALAR
Rs_RipE1 205 WAIIVHR--AEPDLERDVIIDAWGKGPATFAVDGMPTYREGERRTKI--GYDKASGEFAHA-
Ps_HopX1 217 WAETDN--SSA-GSSPVMDFWNSGAAIILAE DSREFAKDRSAVERTY-SFTLAMAAEAGKV

Xs_XopE1 274 TNAFRAEIEDPQTDLHANARDLETAFLANPAPGDI FSAMEVIAP-----
Rs_RipE1 261 -----DMEML-----ATVLAIRVGGISNTMRRLGPD--YRYPPEERVWAVTP
Ps_HopX1 273 T---RETAEVV-----LTHTTSRLQKRLADQLPNVSPLEGGRYQQE-----KS

Xs_XopE1 318 ---ELAQSTRQRIQEYS-----PRTRQALAA--DAAR--QA
Rs_RipE1 301 IVAQRFTDRVKAEMSKPADLGKLMVPPDCATPSSVEPPVTNERLMQFLRHEIHATRIART
Ps_HopX1 313 VLDEAFARVSDK-----LNSDDPRRALQMEIEAVGVAMS

Xs_XopE1 347 YGLDNAQPTSPRTTAATIQDAERLD-----ALGR
Rs_RipE1 361 LGAHSVDTMAH-AARRIVAVASDLQGYPIEAHPLQAKKDAEDIAAAERRRRARRAALGKGE
Ps_HopX1 348 LGAEGVKTVAR-QAPKVVRRARS-----VASSKGM

Xs_XopE1 376 PPLSW-
Rs_RipE1 420 PPATES
Ps_HopX1 377 PPRR--

```

**Figure S1. Phylogenetic analysis of RipE1**

Alignment of the amino acid sequence of RipE1 from *R. solanacearum* GM1000 (Rs\_RipE1), XopE1 from *Xanthomonas campestris* pv. *vesicatoria* (Xs\_XopE1), and HopX1 from *Pseudomonas syringae* pv. *tabaci* 11528 (Ps\_HopX1). Residues forming the predicted catalytic triad are indicated in red, and the conserved domain A is indicated in blue. The black shaded amino acids are identical among the three effectors.



Figure S2

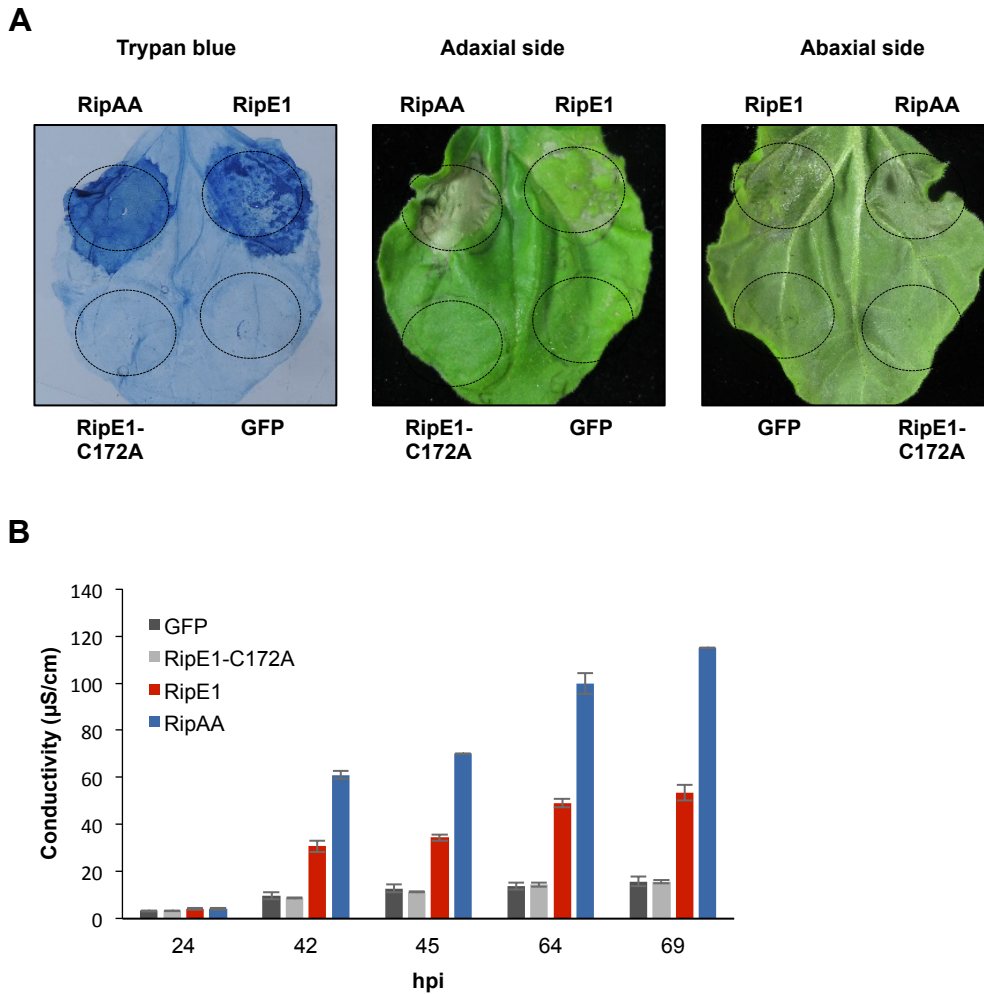

**Figure S2. RipE1 induces cell death in *N. benthamiana*.**

RipE1-GFP, RipE1-C172A-GFP, RipAA-GFP (as positive control), and GFP (as negative control) were expressed in the same leaf of *N. benthamiana* using *Agrobacterium* with an  $OD_{600}$  of 0.5. (a) Trypan blue staining was performed 4 days post-inoculation, and additional photos of an independent unstained leaf is shown for reference. (b) Ion leakage measured in leaf discs taken from *N. benthamiana* tissues expressing the indicated constructs, at the indicated time points. Values indicate mean  $\pm$  SE ( $n=3$  biological replicates). These experiments were repeated 3 times with similar results.

Figure S3

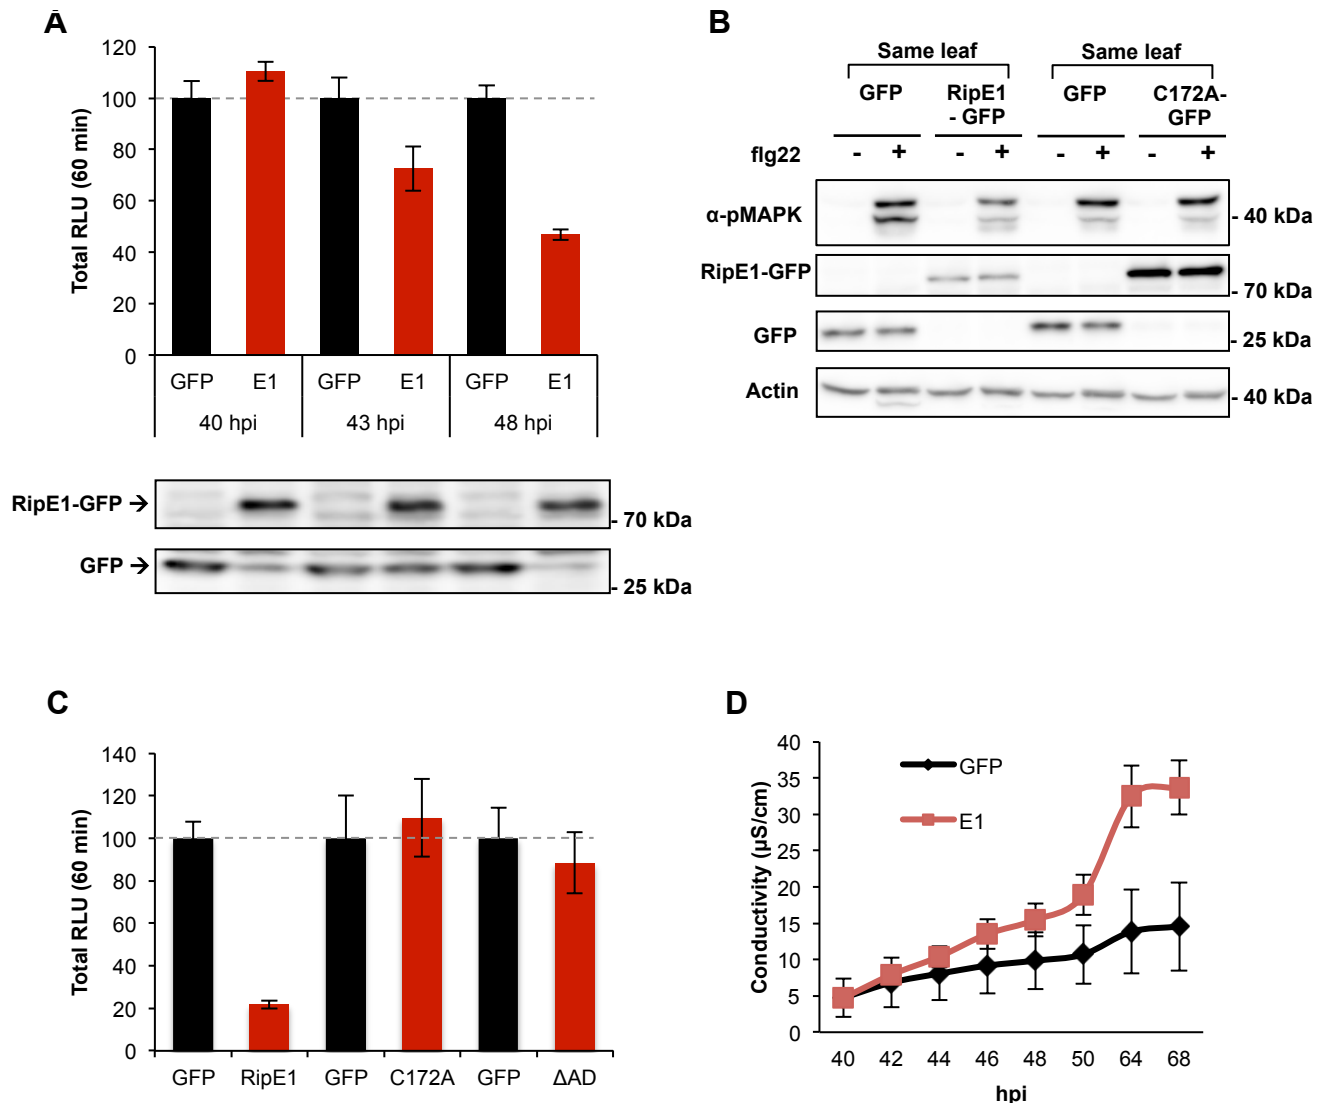

**Figure S3. RipE1 expression inhibits PTI responses in *N. benthamiana*, which correlates with the induction of cell death.**

Agrobacterium was used to induce the transient expression of RipE1-GFP in half of the leaf and GFP in the other half. (a) Oxidative burst triggered by 50 nM flg22 in *N. benthamiana* tissues at the indicated time points, measured in a luminol-based assay as relative luminescence units (RLU). Values are average  $\pm$  SE (n=24), and are represented as % of the GFP control in each time point. Western blot with anti-GFP is shown for reference of protein accumulation at each time point. (b) MAPK activation was induced 40 hours after Agrobacterium infiltration with 100 nM flg22 and analysed 15 minutes after flg22 treatment using anti-phosphorylated MAPK antibody (anti-pMAPK). Immunoblots were also analysed using anti-GFP antibody to verify protein accumulation. Anti-actin was used to verify equal loading. Molecular weight (kDa) marker bands are indicated for reference. (c) Oxidative burst was induced as in (a) and measured 2 days post-Agrobacterium infiltration. Mutant variants are described in the Figure 1. (d) Ion leakage was measured as in the Figure 1. Measurement over time after RipE1 expression reflects that the induction of cell death correlates in time with the suppression of PTI responses. The experiments were repeated three times with similar results.

Figure S4

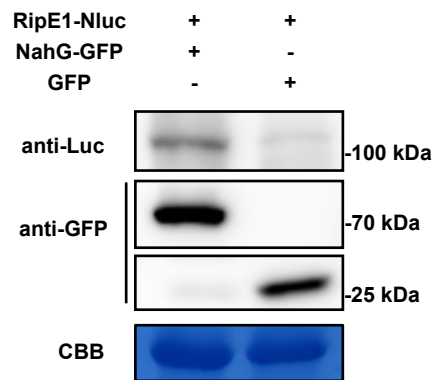

**Figure S4. Protein accumulation upon co-expression of RipE1 and NahG.**

Western blot showing protein accumulation in the experiments shown in the figure 2. Molecular weight (kDa) marker bands are indicated for reference.

Figure S5

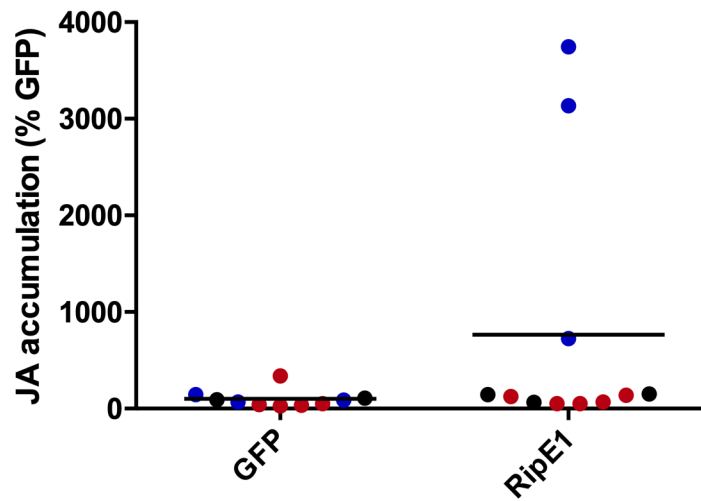

**Figure S5. RipE1 expression leads to an increase in JA contents.**

Measurement of JA accumulation in *N. benthamiana* tissues expressing GFP or RipE1, using *Agrobacterium* with an  $OD_{600}$  of 0.5. Samples were taken 42 hours after *Agrobacterium* infiltration. Three independent biological repeats were performed, and the different colors indicate values from different replicates. Values are represented as % of the GFP control in each replicate.



Figure S6

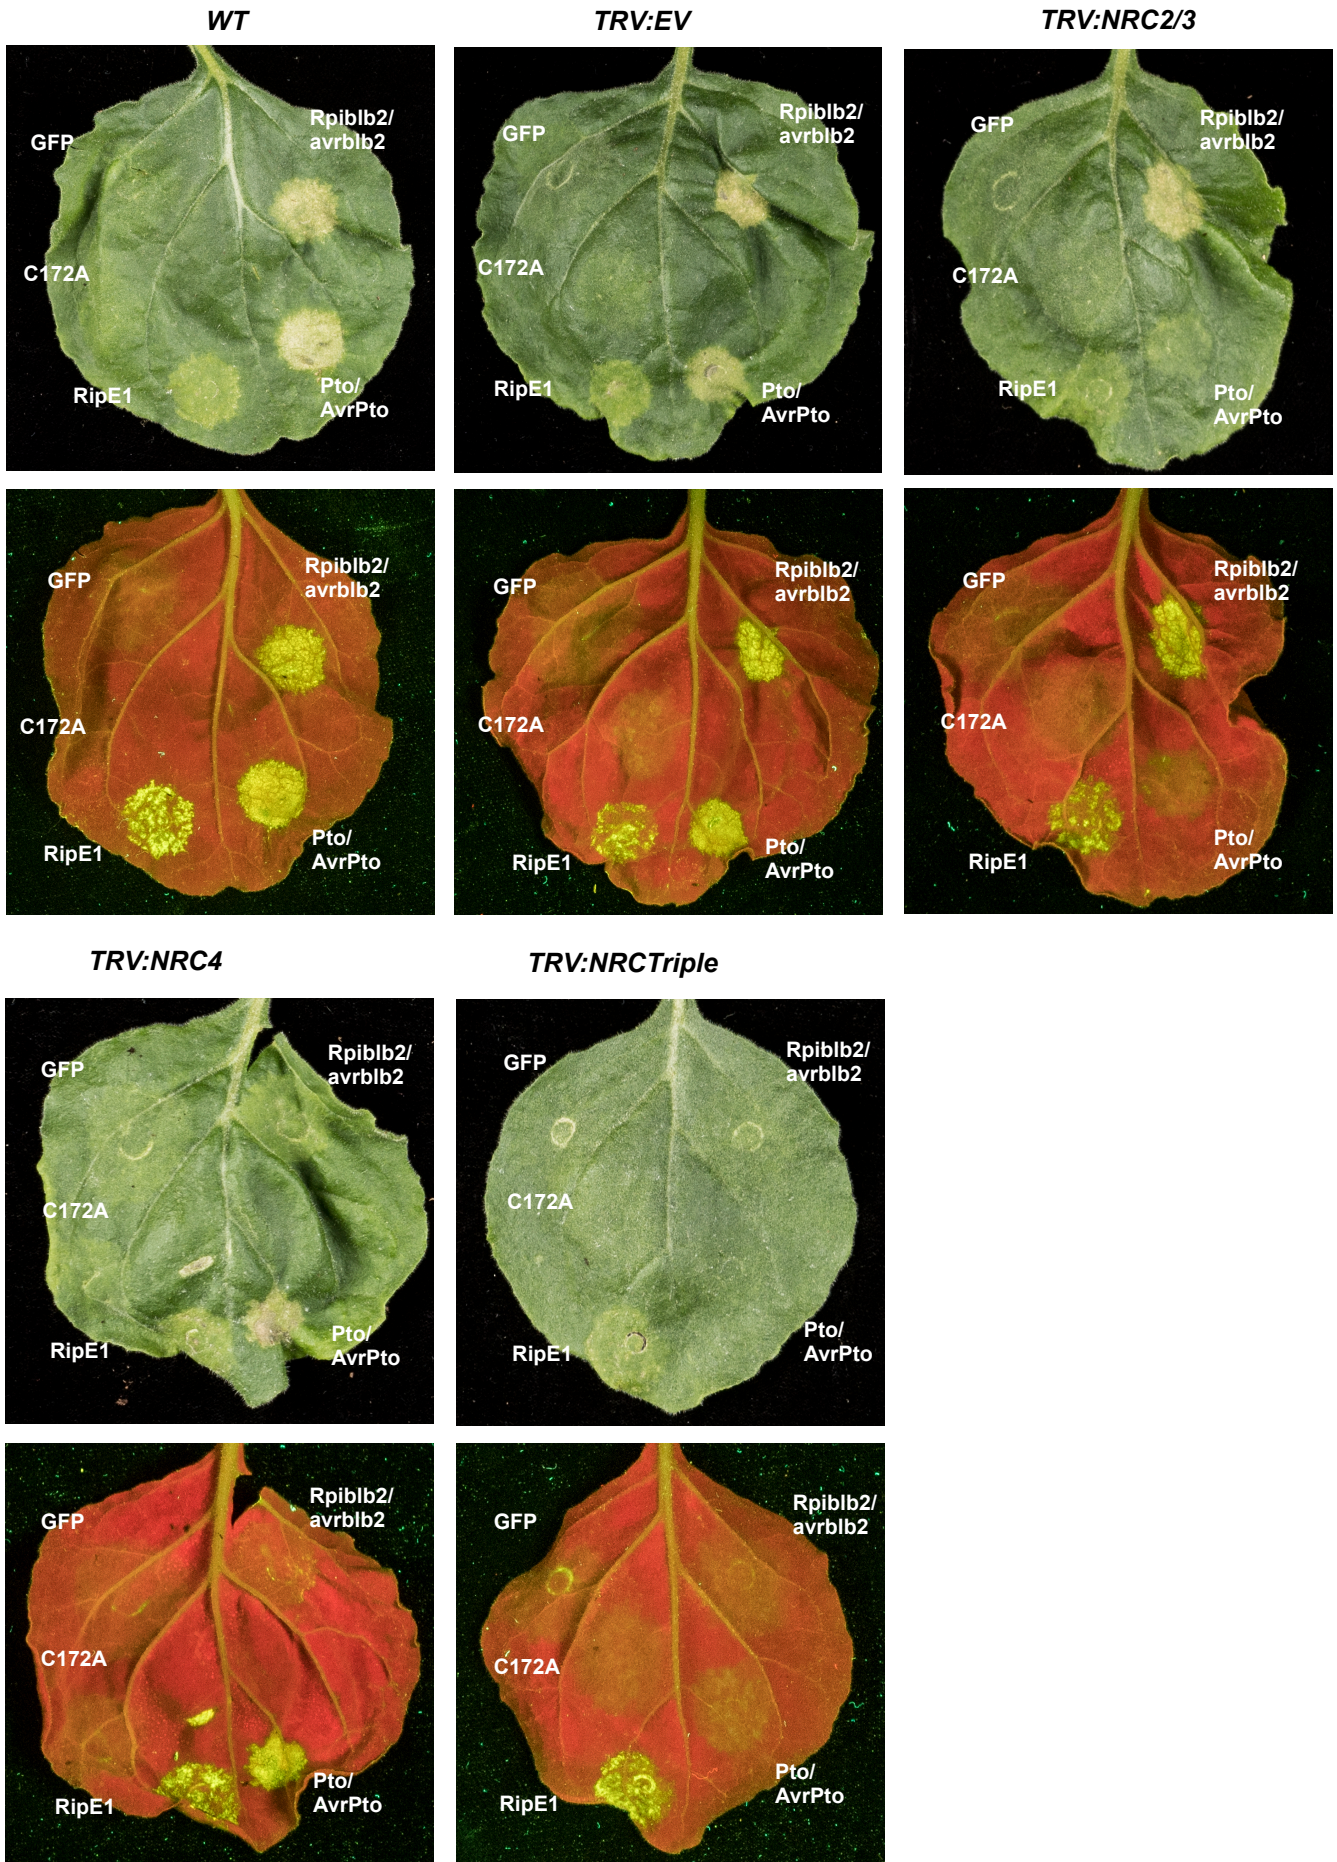

**Figure S6. RipE1-triggered cell death does not require NRC proteins.**

RipE1-GFP, RipE1-C172A-GFP or GFP (as control) were transiently expressed using agrobacterium into wild type (WT) *N. benthamiana*, leaves silenced with EV (as control) and those silenced with different NRC homologs (NRC2/3, NRC4 and NRC2/3/4-Triple), using VIGS. For RipE1-GFP, RipE1-C172A-GFP and GFP an OD<sub>600</sub> of 0.5 was used. RpiIb2 (OD<sub>600</sub> 0.2)/AVRbIb2 (OD<sub>600</sub> 0.1) and Pto (OD<sub>600</sub> 0.6)/AVRPto (OD<sub>600</sub> 0.1), which are NRC4 and NRC2/3 dependent, respectively, were included as controls. Photos were taken 5 days post inoculation under natural or UV light. UV images were taken from the abaxial side and flipped horizontally for representation.

Figure S7

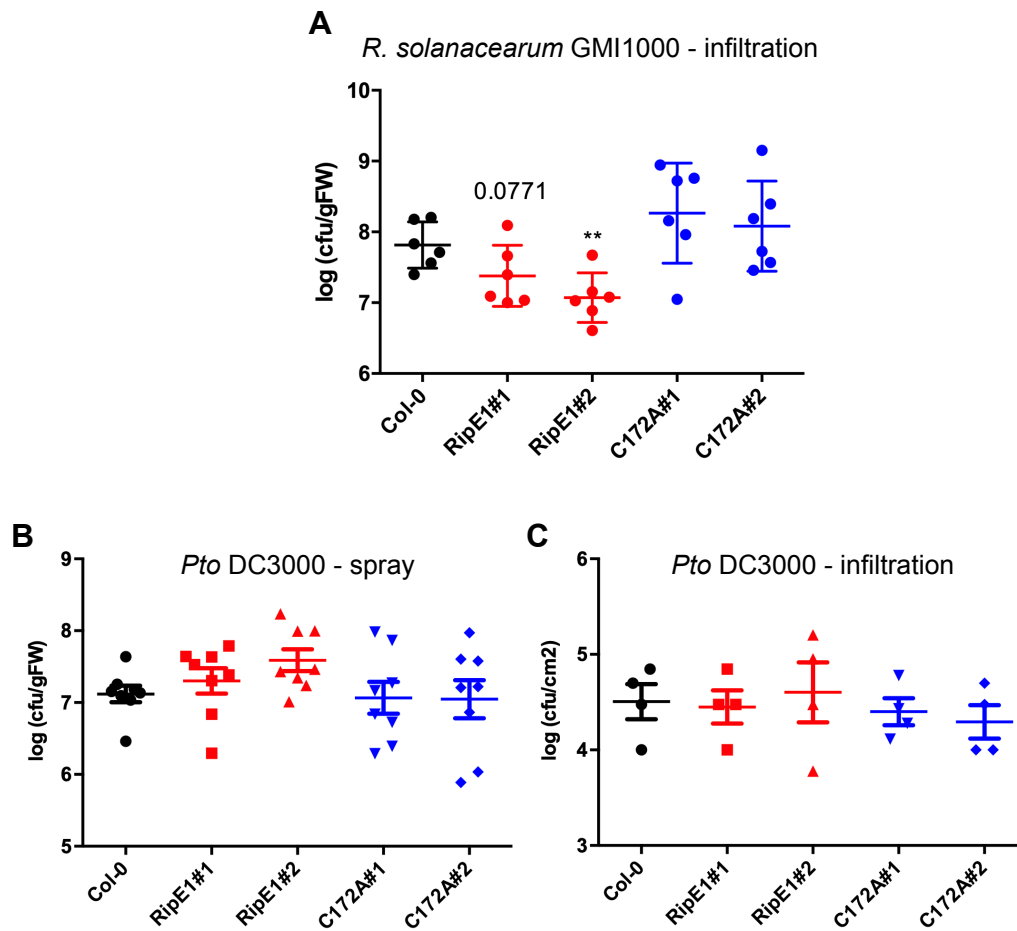

**Figure S7. Leaves of RipE1-expressing Arabidopsis plants show enhanced resistance against inoculation with *R. solanacearum*, but not *P. syringae* pv *tomato* (*Pto*) DC3000.**

(a) Growth of *R. solanacearum* GMI1000 (inoculated at  $10^7$  cfu/ml) infiltrated with a needleless syringe into wild-type Col-0 and RipE1-expressing Arabidopsis plants. Four week-old plants were sprayed with 100  $\mu$ M estradiol and then covered for 2 days prior inoculation. Bacterial colony-forming units (cfu) were determined 2 days post-inoculation (dpi). Values indicate mean  $\pm$  SE (n=6 biological replicates). Asterisks indicate significant differences compared to Col-0 WT plants according to a Student's t test (\*\* p < 0.01). A specific p value is indicated for the RipE1#1 plant to indicate a reproducible (but not statistically significant) difference in bacterial growth compared to Col-0 WT plants. (b) Growth of surface (spray)-inoculated *Pto* DC3000 (inoculated at  $10^8$  cfu/ml) in wild-type Col-0 and RipE1-expressing Arabidopsis seedlings. Three week-old seedlings were sprayed with 100  $\mu$ M estradiol and then covered for 2 days prior inoculation. Bacterial colony-forming units (cfu) were determined 3 days post-inoculation (dpi). Values indicate mean  $\pm$  SE (n=8 biological replicates). (c) Growth of *Pto* DC3000 (inoculated at  $10^5$  cfu/ml) infiltrated with a needleless syringe into wild-type Col-0 and RipE1-expressing Arabidopsis plants. Four week-old plants were sprayed with 100  $\mu$ M estradiol and then covered for 2 days prior inoculation. Bacterial colony-forming units (cfu) were determined 3 days post-inoculation (dpi). Values indicate mean  $\pm$  SE (n=4 biological replicates). Experiments were repeated more than three times with similar results.

Figure S8

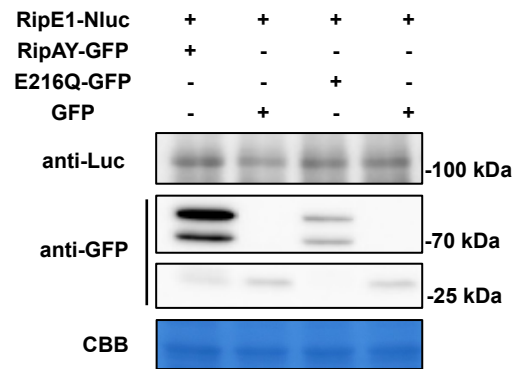

**Figure S8. Protein accumulation upon co-expression of RipE1 and RipAY.** Western blot showing protein accumulation in the experiments shown in the figure 6. Molecular weight (kDa) marker bands are indicated for reference.



Figure S9

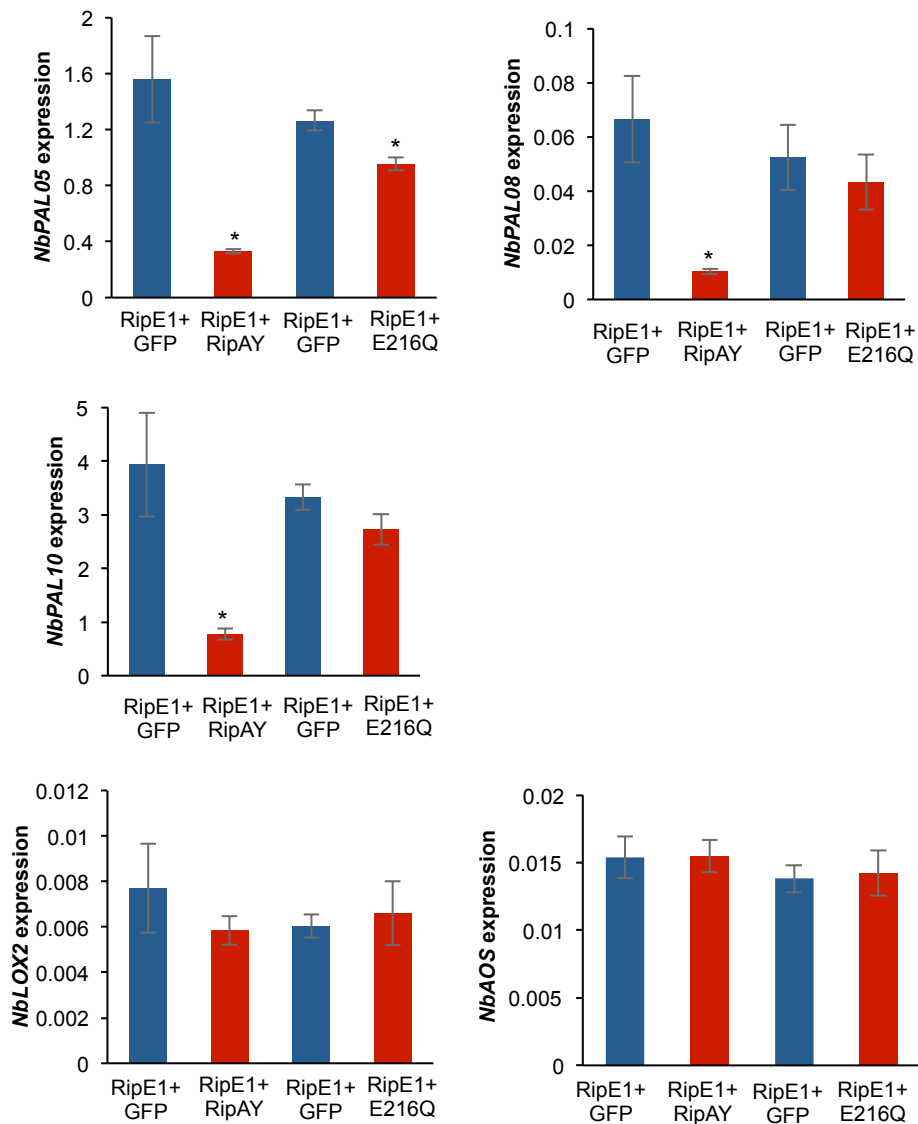

**Figure S9. RipAY suppresses the overexpression of SA-related genes triggered by RipE1.**

Quantitative RT-PCR to determine the expression of *NbPAL05*, *NbPAL08*, *NbPAL10*, *NbLOX2*, and *NbAOS* in *N. benthamiana* tissues 48 hours after Agrobacterium infiltration. Expression values are relative to the expression of the housekeeping gene *NbEF1a*. Values indicate mean  $\pm$  SE (n=3 biological replicates). Asterisks indicate significant differences compared to the mock control according to a Student's t test (\* p < 0.05).
